# Supplementary material
Source: publisher site journal article supplement (http://www.spandidos-publications.com/2579/downloadSupplementary)

Figure S1. Flow cytometry analysis of tumour infiltrating CD45<sup>+</sup> cells in patients with non-small cell lung cancer. Lymphocytes and monocytes in single cells were gated. Most tumour infiltrating CD45<sup>+</sup> cells were HLA-DR positive. Many CD11c<sup>+</sup> cells were CD163 positive and CD20 negative. The CD11c<sup>+</sup> subset contained cells positive and negative for CD14 and CD86. Sq; squamous cell carcinoma, Ad; adenocarcinoma.

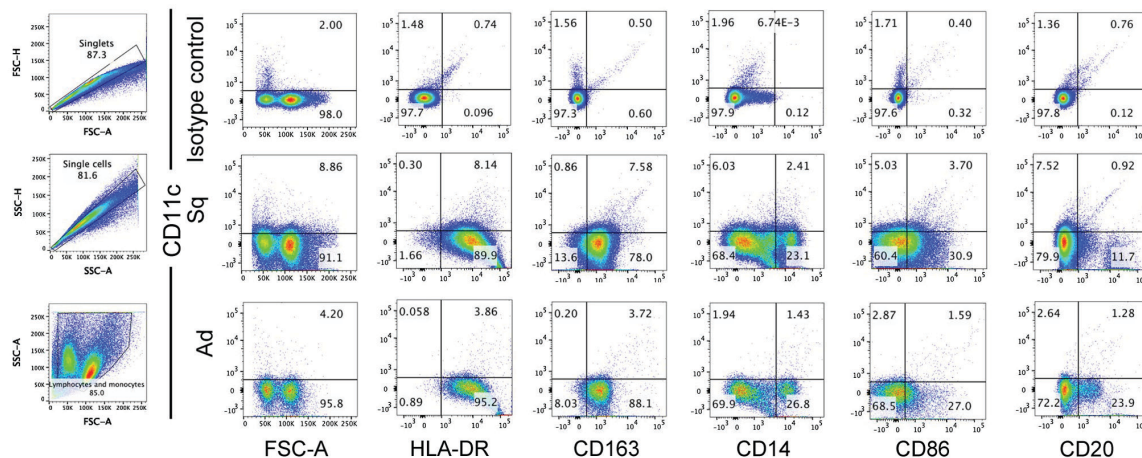

Supplement: Supplementary file 1 [file downloadSupplementary]
